# Supplementary material for: Agreement between self-reported and registered age at asthma diagnosis in Finland
Source: Springer Nature journal article supplement (doi:10.1186/s12890-024-02949-3), 2024-03-15

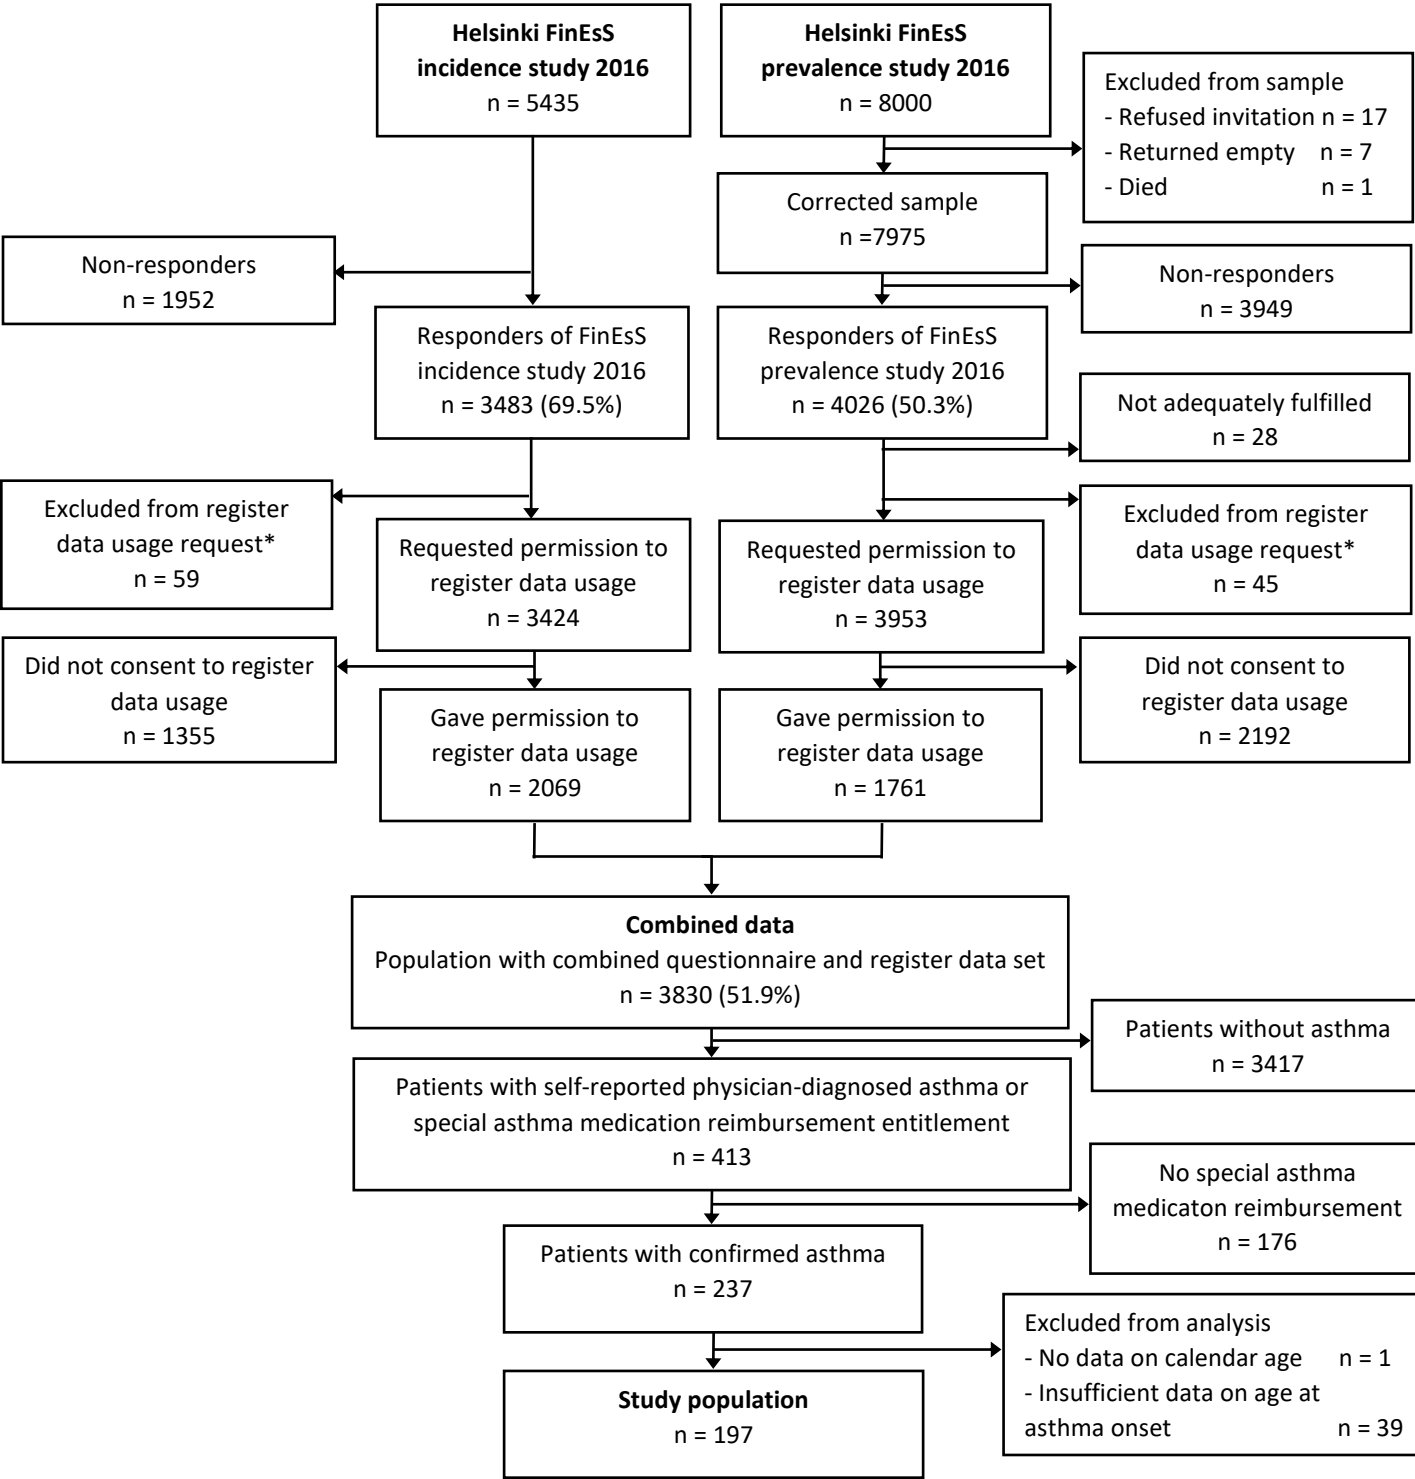

Supplement: MOESM3 [file 26865188]
